# Supplementary material for: Flexible organic/inorganic heterojunction transistors with low operating voltage
Source: Royal Society of Chemistry journal article supplement (doi:10.1039/c3tc31456a), 2013-01-01
Supplement: c3tc31456a.pdf [file c3tc31456a.pdf]

## Supporting Information

### Flexible organic/inorganic heterojunction transistors with low operating voltage

*Ye Zhou, Su-Ting Han, Li Zhou, Yan Yan, Long-Biao Huang, Jing Huang and V. A. L. Roy\**

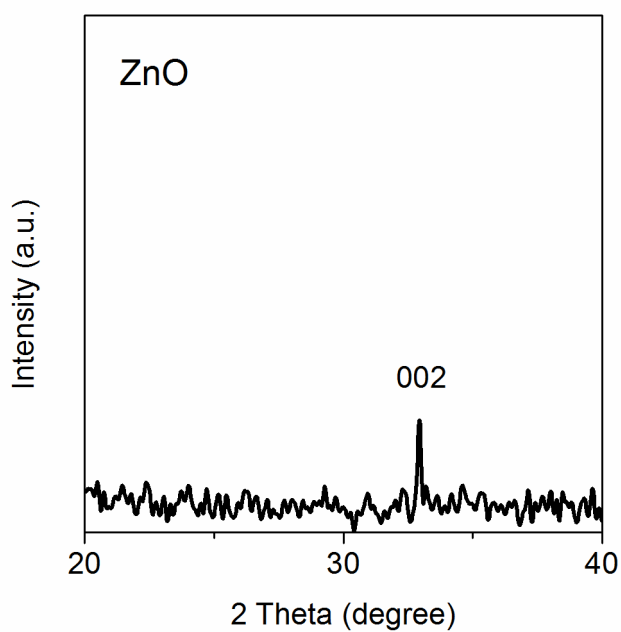

Fig. S1. XRD pattern of ZnO film.

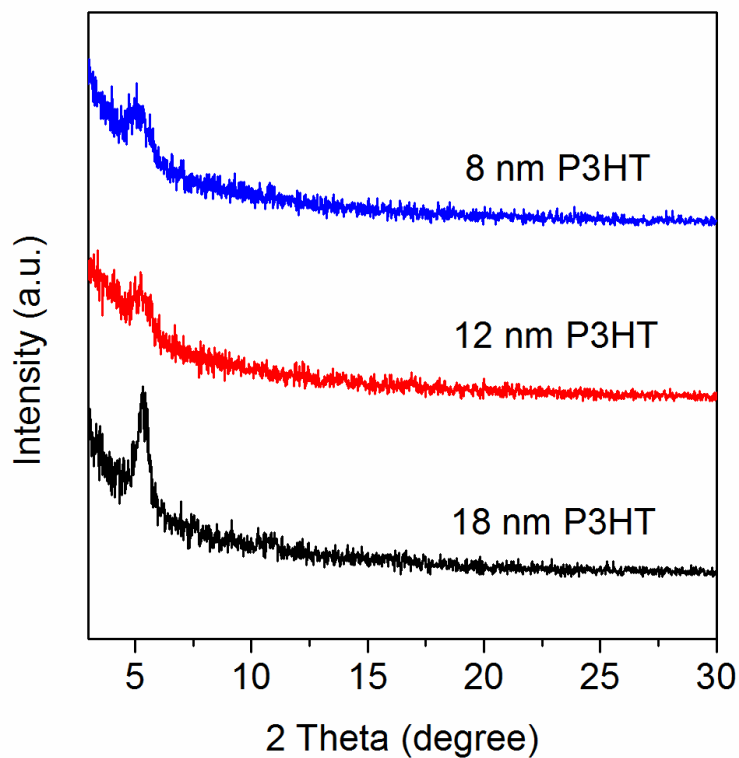

Fig. S2. XRD patterns of different thicknesses of P3HT on ZnO.

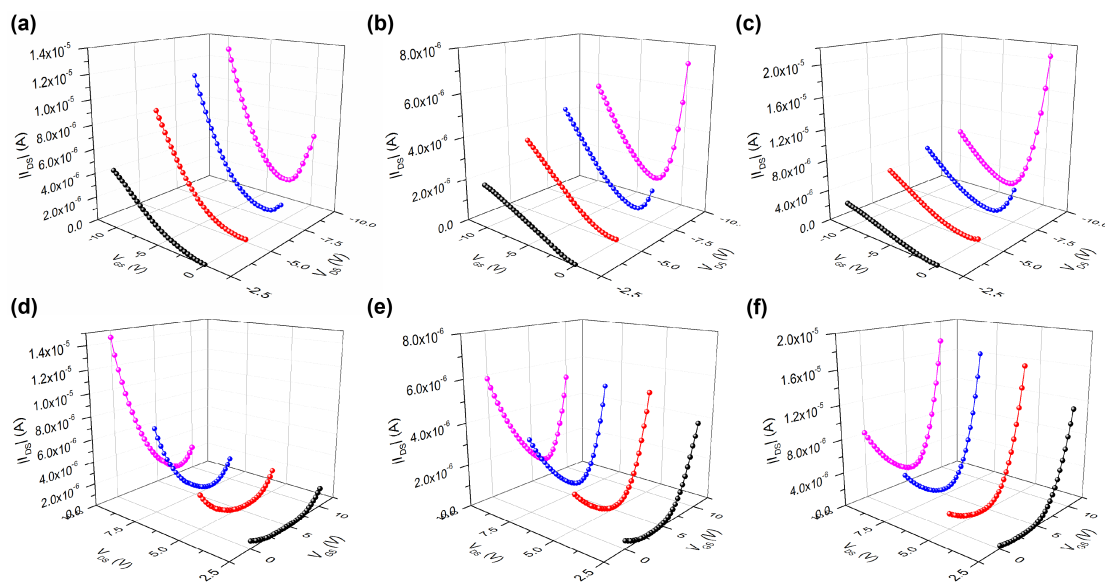

Fig. S3. Transfer characteristics of the ambipolar transistors with (a) 18 nm (b) 12 nm and (c) 8 nm P3HT in hole enhancement mode at various  $V_{DS}$ . Transfer characteristics of the ambipolar transistors with (d) 18 nm (e) 12 nm and (f) 8 nm P3HT in electron enhancement mode at various  $V_{DS}$ .

**Table S1.** Characteristics of the ambipolar transistors with various thicknesses of P3HT: roughness of P3HT, threshold voltage in hole-enhancement mode and threshold voltage in electron-enhancement mode.

|                                                          | <b>8 nm P3HT</b> | <b>12 nm P3HT</b> | <b>18 nm P3HT</b> |
|----------------------------------------------------------|------------------|-------------------|-------------------|
| <b>Roughness (<math>R_{rms}</math>)</b>                  | 0.59 nm          | 0.76 nm           | 1.17 nm           |
| <b>Threshold voltage<br/>(hole-enhancement mode)</b>     | -3.8             | -3.1              | -2.8 V            |
| <b>Threshold voltage<br/>(electron-enhancement mode)</b> | 5.8 V            | 6.9 V             | 7.9 V             |
